# Supplementary material
Source: PubMed Central journal article supplement (PMC4892359)
Supplement: NIHMS790008-supplement-supl_2.pdf [file NIHMS790008-supplement-supl_2.pdf]

Supplementary Table 2. Relative risks (RR) and 95% confidence intervals (CIs) for colorectal cancer according to peanut and other nut consumptions

|                              | Frequency of nut consumption (28g serving) |                   |                   |                   | <i>P</i> <sub>trend</sub> |
|------------------------------|--------------------------------------------|-------------------|-------------------|-------------------|---------------------------|
|                              | Never                                      | 1-3 times/month   | Once/week         | ≥ 2 times/week    |                           |
| Peanut intake, servings/d    | 0                                          | 0.01-0.09         | 0.10-0.19         | ≥ 0.20            |                           |
| Person-years                 | 394,578                                    | 579,130           | 131,489           | 109,932           |                           |
| No, of cases                 | 329                                        | 495               | 84                | 82                |                           |
| Age-adjusted                 | 1.00                                       | 1.00 (0.87, 1.16) | 0.77 (0.60, 0.98) | 0.85 (0.66, 1.08) | 0.09                      |
| Multivariable *              | 1.00                                       | 1.01 (0.87, 1.16) | 0.77 (0.60, 0.99) | 0.85 (0.66, 1.09) | 0.10                      |
| Other nut intake, servings/d | 0                                          | 0.01-0.09         | 0.10-0.19         | ≥ 0.20            |                           |
| Person-years                 | 471,530                                    | 552,562           | 108,709           | 82,326            |                           |
| No, of cases                 | 376                                        | 475               | 73                | 66                |                           |
| Age-adjusted                 | 1.00                                       | 0.99 (0.86, 1.14) | 0.80 (0.62, 1.03) | 0.90 (0.69, 1.18) | 0.28                      |
| Multivariable *              | 1.00                                       | 1.00 (0.87, 1.16) | 0.82 (0.63, 1.06) | 0.93 (0.71, 1.23) | 0.43                      |

\* Adjusted for age (month), physical activity (metabolic-equivalents/week, quintiles), family history of colorectal cancer (yes/no), history of previous lower endoscopy (yes/no), history of ulcerative colitis (yes/no), history of polyps (yes/no), aspirin use (<1, 1-3, 3.1-7, >7 tablets/week), multivitamin use (yes/no), pack-years of smoking (never smoker, 1-9, 10-24, 25-44, and ≥ 45 pack-years), alcohol intake (never, 0.1-5, 5.1-15, > 15 g/d), and total energy intake (kcal, continuous), body-mass index (<22, 22-22.9, 23-24.9, 25-28.9, ≥29 kg/m<sup>2</sup>), and history of diabetes mellitus (yes/no).
